# Supplementary material for: Acceptability, Usability, and Views on Deployment of Peek, a Mobile Phone mHealth Intervention for Eye Care in Kenya: Qualitative Study
Source: PubMed Central journal article supplement (PMC4877502; doi:10.2196/mhealth.4746), 2016-05-09

# Eye exams on your mobile

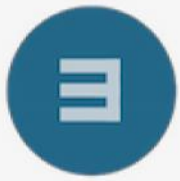

**Visual Acuity**

Test distance vision

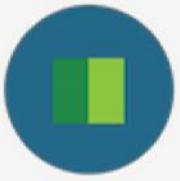

**SightSim™**

Simulate visual acuity

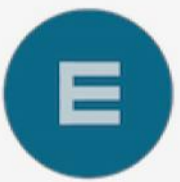

**Tutorial**

Learn how to use Peek

## Units

- logMAR (1.0)
- Snellen - metric (6/60)
- Snellen - imperial (20/200)

## Instructions

- Show full instructions on next test

## Feedback

- Send anonymous feedback

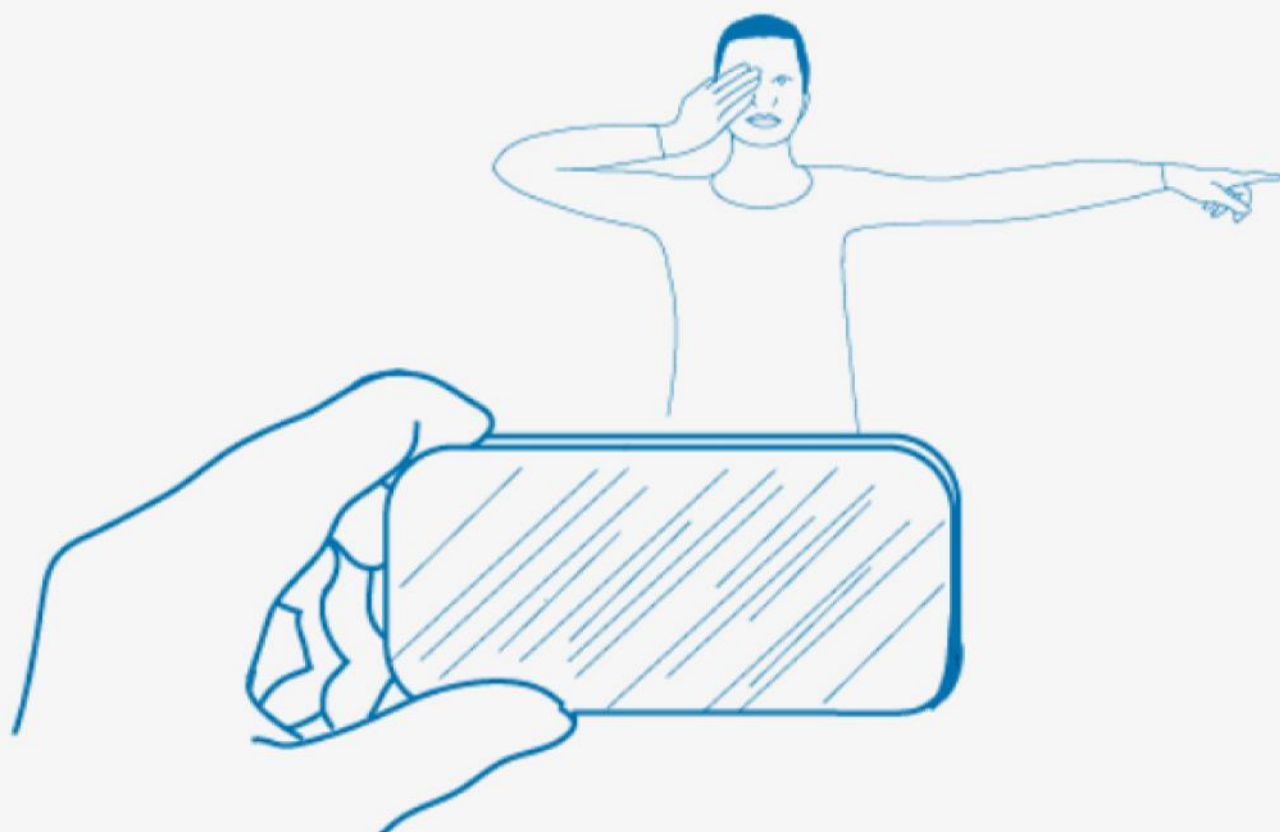

Ask the client to show you which way the legs or the E are pointing.

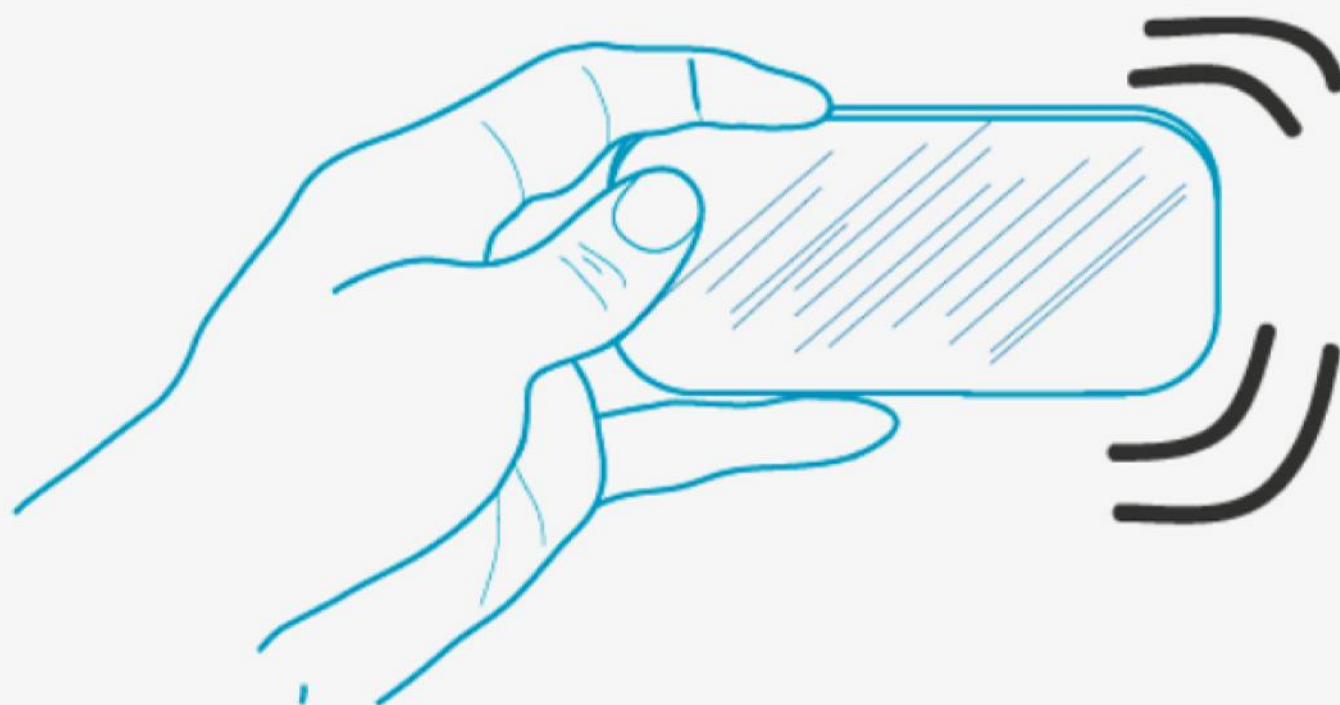

When the test is finished, the phone will vibrate and you will hear an alert. The results will be shown on the screen.

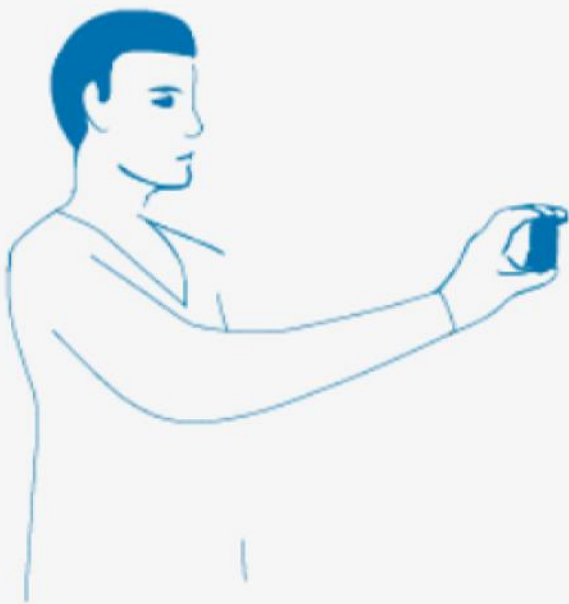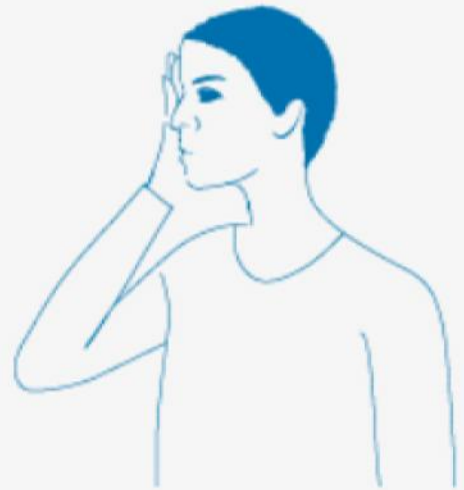

Hold the phone at the clients eye height  
at a distance of 2 meters.

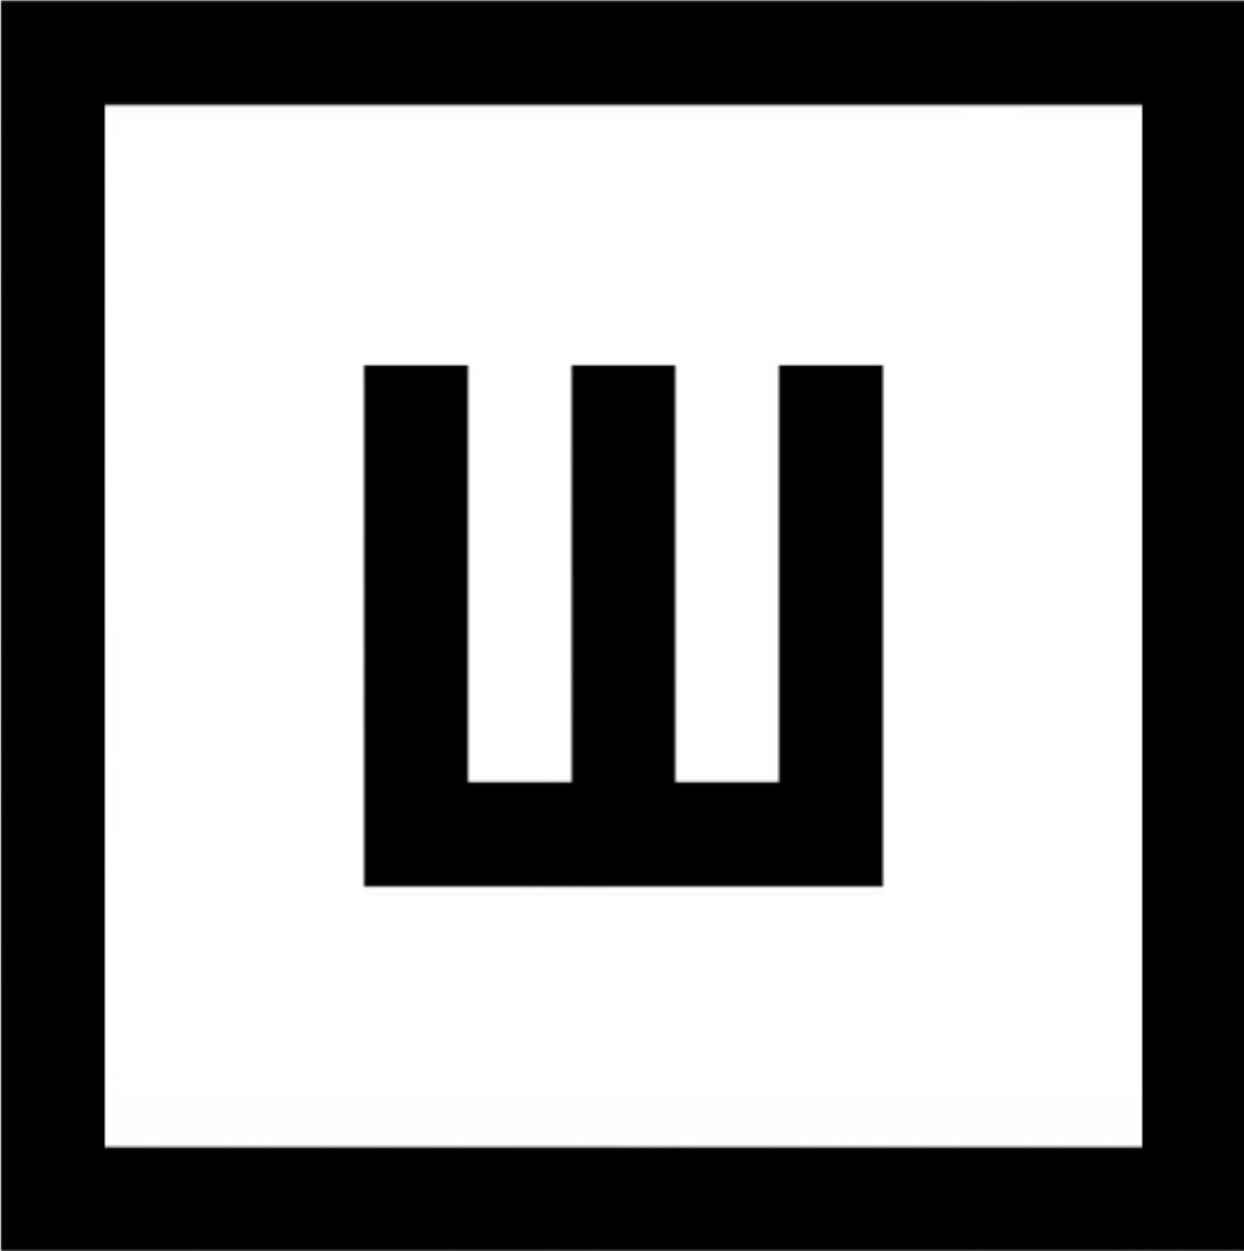

The tested vision level is 6/60. We can show an approximation of how this is affecting your view of the world with SightSim.

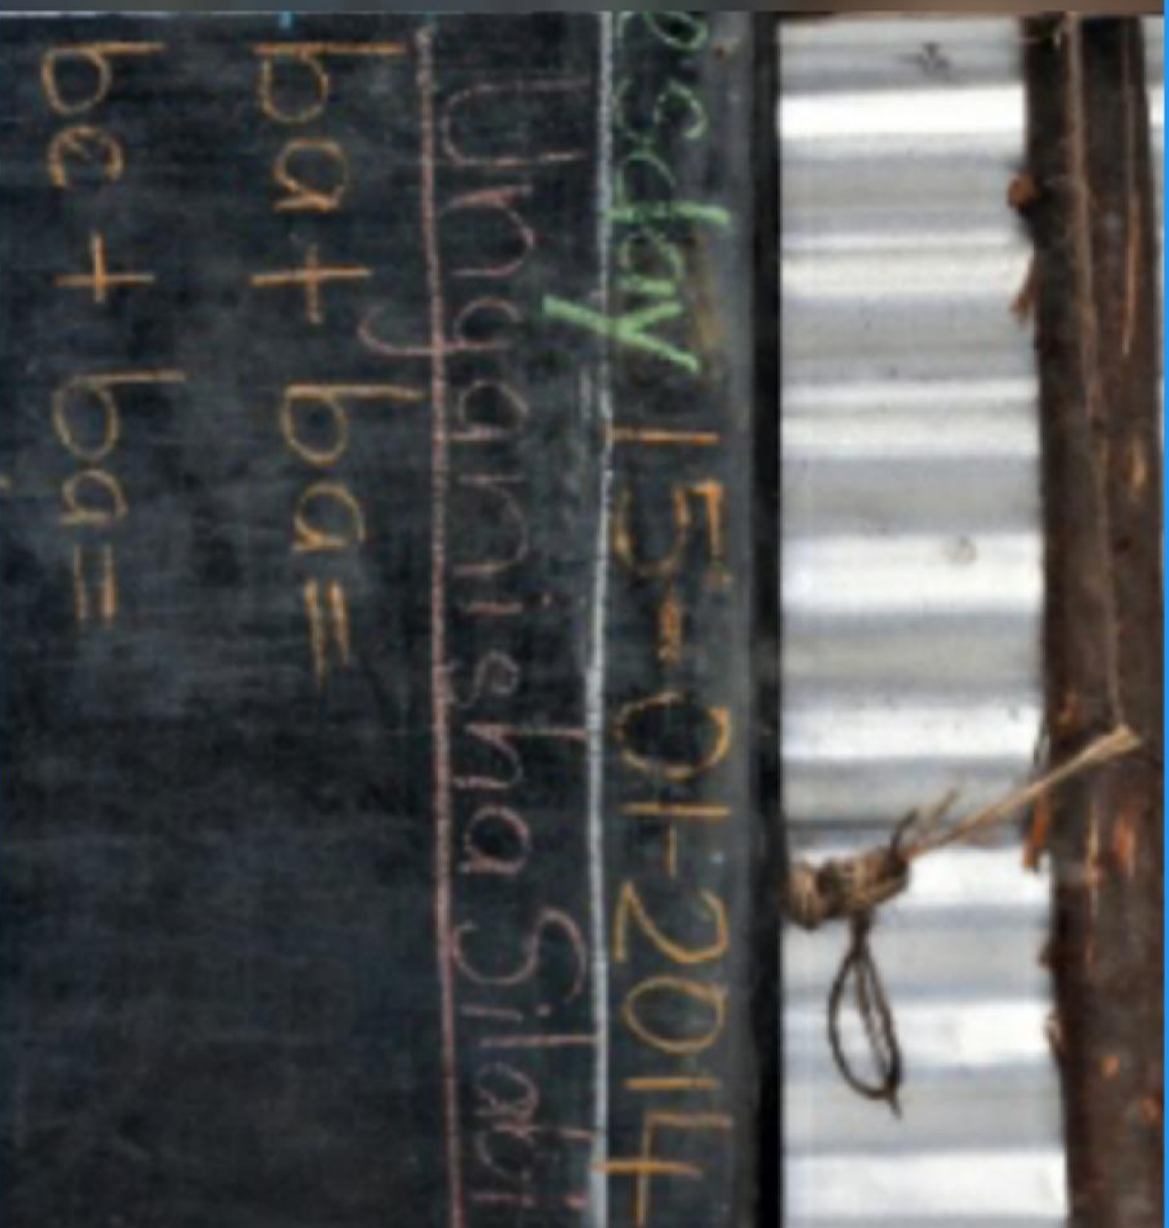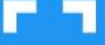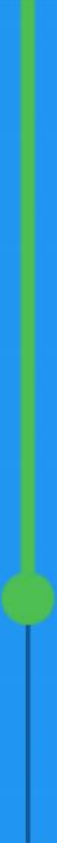

Supplement: mhealth_v4i2e30_app1.pdf [file mhealth_v4i2e30_app1.pdf]
